# Supplementary material for: Construction of Al-ZnO/CdS photoanodes modified with distinctive alumina passivation layer for improvement of photoelectrochemical efficiency and stability
Source: Royal Society of Chemistry journal article supplement (doi:10.1039/c8nr06880a), 2018-01-01
Supplement: c8nr06880a1.pdf [file c8nr06880a1.pdf]

## Supporting information

### Construction of Al-ZnO/CdS Photoanodes Modified with Distinctive Alumina Passivation Layer for Improvement of Photoelectrochemical Efficiency and Stability

Ruyi Wang,<sup>a,b</sup> Xiaodong Li,<sup>e</sup> Lu Wang,<sup>a,b</sup> Xirui Zhao,<sup>c</sup> Guangcheng Yang,<sup>e</sup> Aidong Li,<sup>c</sup> Congping Wu,<sup>a,d</sup>

Qing Shen,<sup>f</sup> Yong Zhou,<sup>\*a,b,d</sup> and Zhigang Zou<sup>a,b,c,d</sup>

<sup>a</sup>National Laboratory of Solid State Microstructures, Collaborative Innovation Center of Advanced Microstructures, Department of Physics, Eco-materials and Renewable Energy Research Center (ERERC), Nanjing University, Nanjing 210093, P. R. China.

E-mail: zhouyong1999@nju.edu.cn.

<sup>b</sup> Jiangsu Provincial Key Laboratory of Nanotechnology

<sup>c</sup> College of Engineering and Applied Science, Nanjing University, Nanjing 210093, P. R. China.

<sup>d</sup> Kunshan Sunlaite New Energy Co. Ltd., Kunshan Innovation Institute of Nanjing University, Kunshan, No. 1666, South Zuchongzhi Road, Jiangsu 215347, P. R.China.

<sup>e</sup> Institute of Chemical Materials, China Academy of Engineering Physics, Mianyang 621900, P. R. China.

<sup>f</sup> Faculty of Informatics and Engineering, University of Electro-Communications, Tokyo 185-8585, Japan.

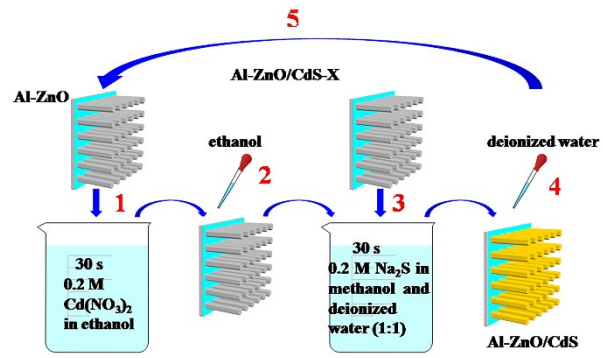

**Figure S1.** Schematic diagram of depositing CdS on Al-ZnO NRs by SILAR.

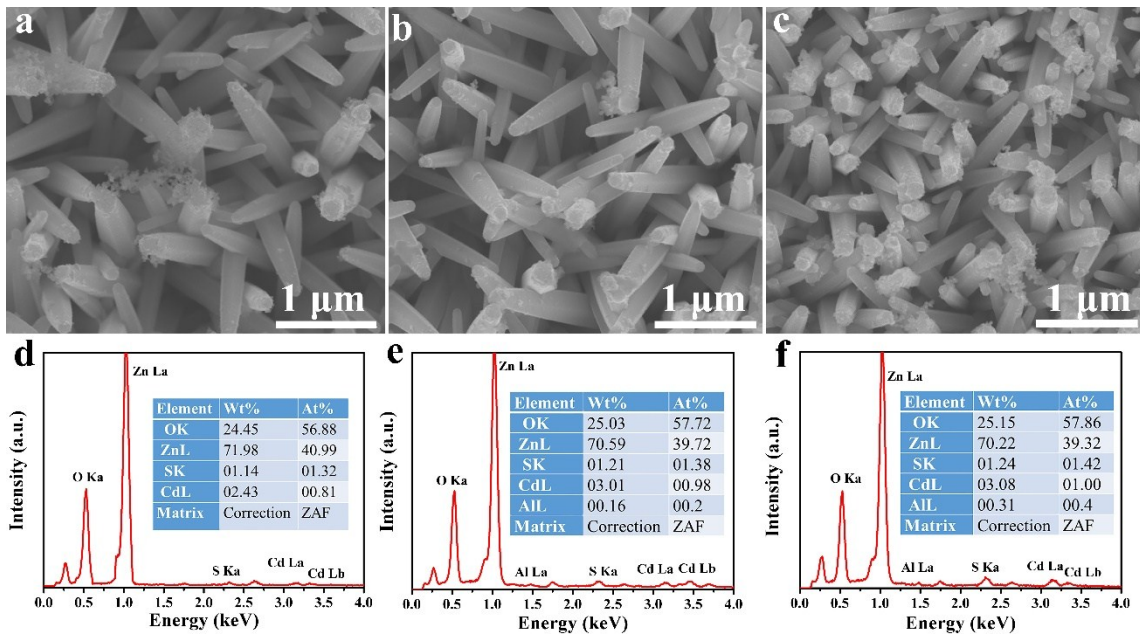

**Figure S2.** FE-SEM image and corresponding EDS, (a) and (d) for Al-ZnO, (b) and (e) for 0.01 Al-ZnO/CdS, (c) and (f) for 0.03 Al-ZnO/CdS.

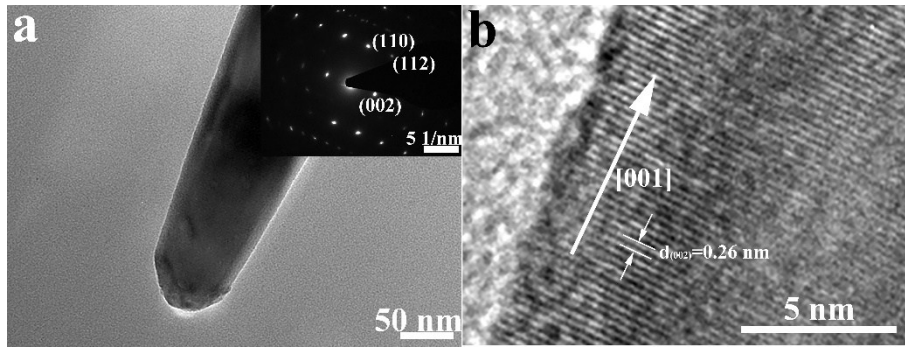

**Figure S3.** (a) TEM and (b) HRTEM images of ZnO. The inset of (a) shows selected area electron diffraction patterns.

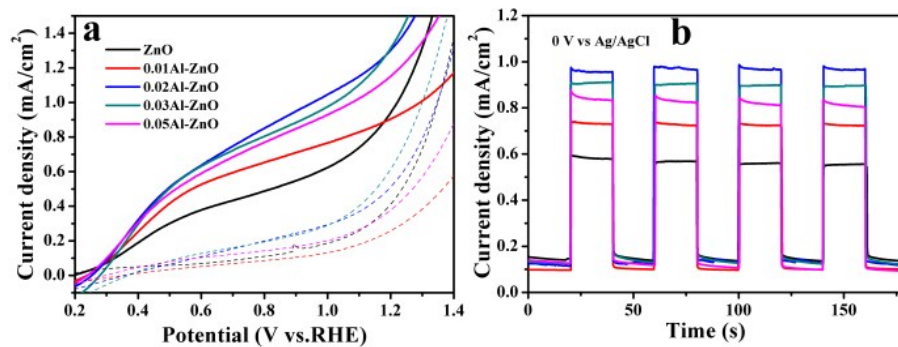

**Figure S4.** (a) Linear sweep voltammograms of Al-ZnO with different Al doping amount. The dotted line is the corresponding dark current curves), and (b) the corresponding amperometric I-t curves plotted at an external potential of 0 V versus Ag/AgCl, under chopped illumination.

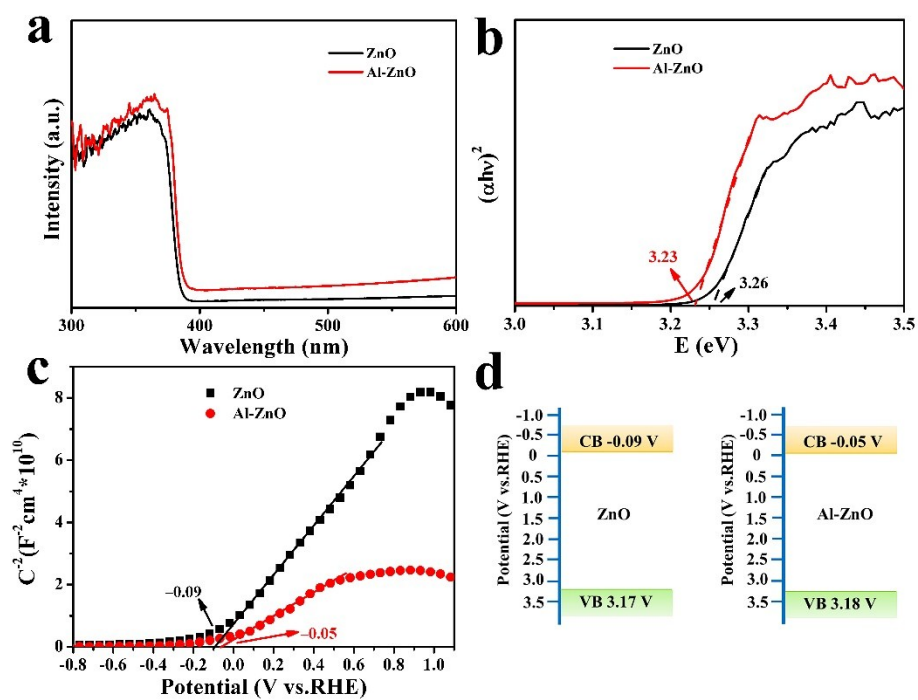

**Figure S5.** (a) and (b) UV-vis absorption spectra of ZnO and Al-ZnO. (c) Mott-Schottky plots for ZnO and Al-ZnO, measured at 1 kHz. (d) Band positions of ZnO and Al-ZnO.

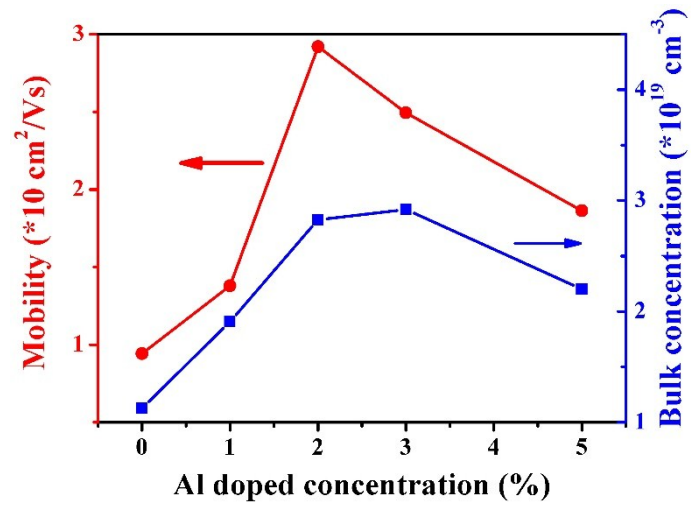

**Figure S6.** The mobility and charge carrier bulk concentration obtained from Hall Effect measurement of Al-ZnO with different Al doped concentration.

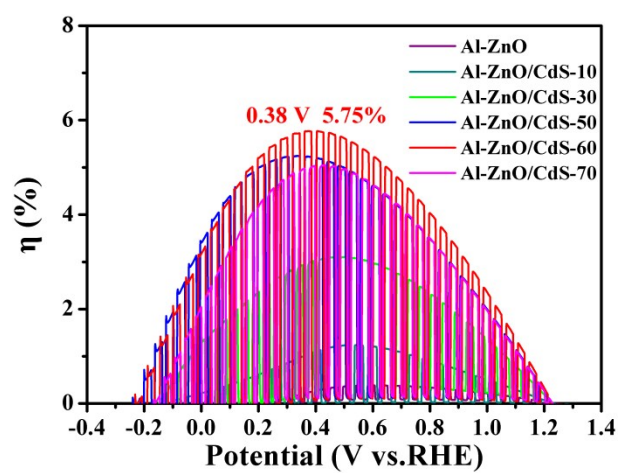

**Figure S7.** Photoconversion efficiencies of Al-ZnO and Al-ZnO/CdS with different SILAR cycles.



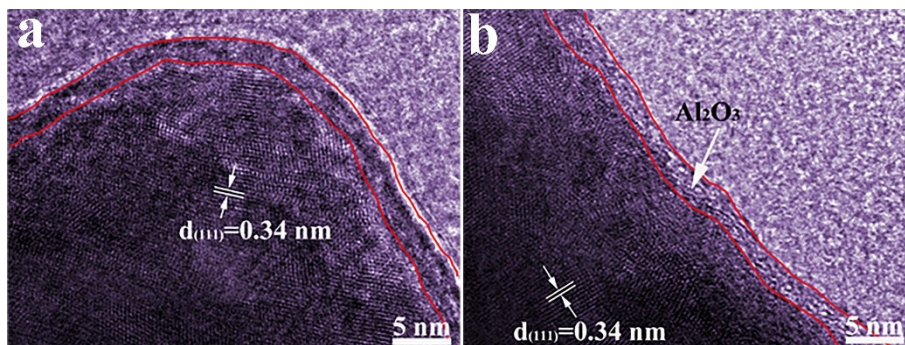

**Figure S8.** The HRTEM images of the Al-ZnO/CdS photoanode coating with  $\sim 3$  nm  $\text{Al}_2\text{O}_3$  by (a) DCMS and (b) ALD.

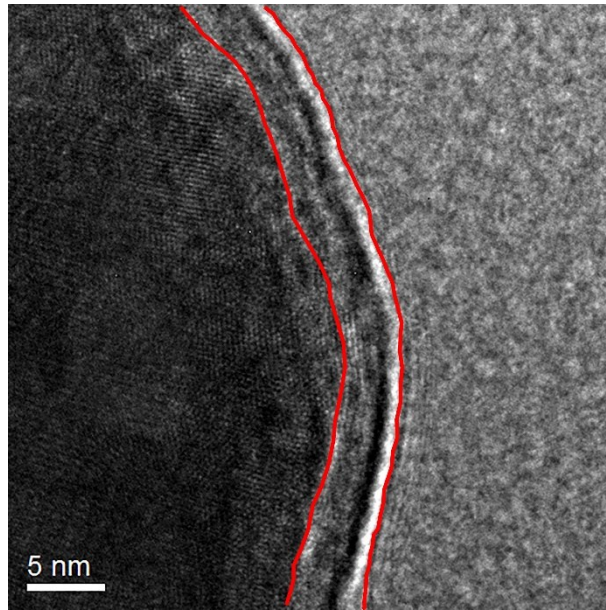

**Figure S9.** The HRTEM images of the Al-ZnO/CdS photoanode coating with  $\sim 5$  nm Al<sub>2</sub>O<sub>3</sub> by DCMS.

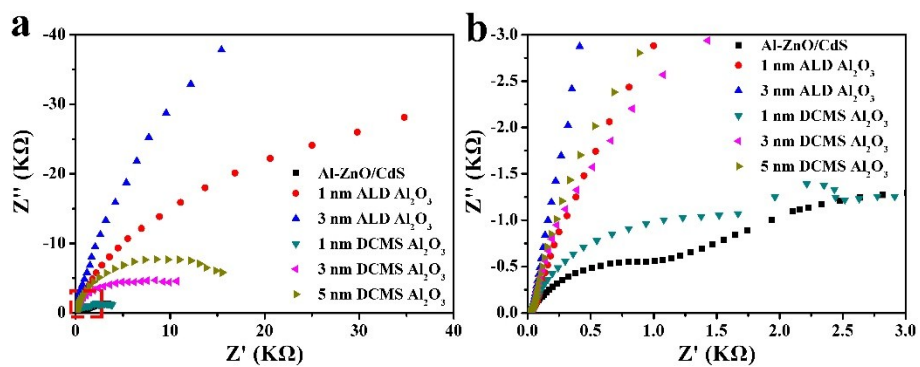

**Figure S10.** (a) EIS Nyquist plots of Al-ZnO/CdS coated with 1 and 3 nm Al<sub>2</sub>O<sub>3</sub> by ALD and DCMS. (b) Amplified section in (a).

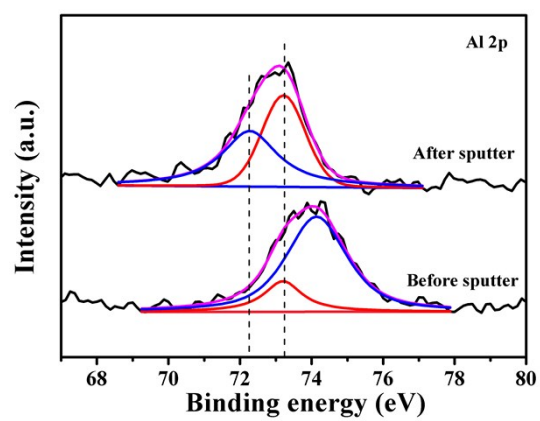

**Figure S11.** Al 2p spectra of Al-ZnO/CdS DCMS 3nm Al<sub>2</sub>O<sub>3</sub> before and after Ar sputter.

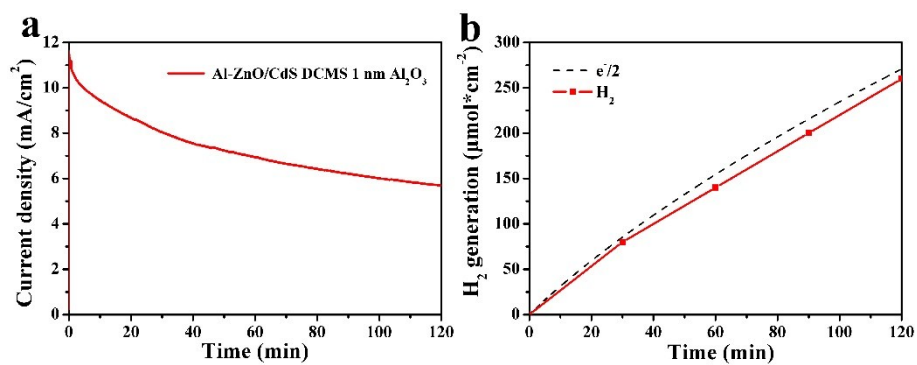

**Figure S12.** (a) Photocurrent stability of the Al-ZnO/CdS DCMS 1 nm Al<sub>2</sub>O<sub>3</sub> obtained at 1.23 V vs. RHE. (b) H<sub>2</sub> evolution for the Al-ZnO/CdS DCMS 1 nm Al<sub>2</sub>O<sub>3</sub> sample derived from the potentiostatic photocurrent measurement. The dashed line correspond to a faradaic efficiency of 100%.

**Table S1.** A brief review of similar ZnO/CdS photoelectrodes and the corresponding photoresponses.

| Photoanode                                            | Electrolyte                                                            | Photocurrent density<br>(mA/cm <sup>2</sup> )               | Maximum<br>Photoconversion<br>efficiency (%) | Ref.         |
|-------------------------------------------------------|------------------------------------------------------------------------|-------------------------------------------------------------|----------------------------------------------|--------------|
| ZnO/CdS NAs                                           | 0.25 M Na <sub>2</sub> S and<br>0.35 M Na <sub>2</sub> SO <sub>3</sub> | 6<br>(0 V <sub>Ag/AgCl</sub> , λ≥435 nm )                   | —                                            | [1]          |
| ZnO/Ag/CdS NAs                                        | 0.25 M Na <sub>2</sub> S and<br>0.35 M Na <sub>2</sub> SO <sub>3</sub> | 4<br>(0V <sub>SCE</sub> , 100mW/cm <sup>2</sup> )           | 3.13<br>(0.34 V vs.RHE)                      | [2]          |
| 3D branched ZnO<br>NWA/CdS                            | 0.5 M Na <sub>2</sub> S                                                | 3.58<br>(0 V <sub>Ag/AgCl</sub> , 70 mW/cm <sup>2</sup> )   | 3.1<br>(not given)                           | [3]          |
| ZnFe <sub>2</sub> O <sub>4</sub> /ZnO/CdS<br>NAs      | 0.5 M Na <sub>2</sub> S                                                | 3.88<br>(0 V <sub>Ag/AgCl</sub> , 70 mW/cm <sup>2</sup> )   | 4.43<br>(0.2 V vs.RHE)                       | [4]          |
| ZnO/CdS NAs                                           | 1 M Na <sub>2</sub> S                                                  | 3.31<br>(0 V <sub>Ag/AgCl</sub> , 100 mW/cm <sup>2</sup> )  | —                                            | [5]          |
| ZnO/CdS NTs                                           | 0.25 M Na <sub>2</sub> S and<br>0.35 M Na <sub>2</sub> SO <sub>3</sub> | ~7.5<br>(0 V <sub>SEC</sub> , λ≥420 nm )                    | —                                            | [6]          |
| ZnO NRs/CdS                                           | 1 M Na <sub>2</sub> S                                                  | 6<br>(0 V <sub>Ag/AgCl</sub> , 100 mW/cm <sup>2</sup> )     | —                                            | [7]          |
| 3D ZnO/Au/CdS<br>sandwich                             | 0.25 M Na <sub>2</sub> S and<br>0.35 M Na <sub>2</sub> SO <sub>3</sub> | 5.7<br>(0 V <sub>Ag/AgCl</sub> , 100 mW/cm <sup>2</sup> )   | —                                            | [8]          |
| ZnO NRs/CdS                                           | 0.25 M Na <sub>2</sub> S and<br>0.35 M Na <sub>2</sub> SO <sub>3</sub> | 9.16<br>(0.4 V <sub>SCE</sub> , 100 mW/cm <sup>2</sup> )    | 4.03<br>(about -0.4 V <sub>SCE</sub> )       | [9]          |
| H-ZnO/CdS/Ni(OH) <sub>2</sub>                         | 0.5 M Na <sub>2</sub> SO <sub>4</sub><br>(with pH buffered<br>to ~7)   | 4.65<br>(0.4 V <sub>Ag/AgCl</sub> , 60 mW/cm <sup>2</sup> ) | 4.12<br>(0.68 V vsRHE)                       | [10]         |
| Al-ZnO/CdS 60<br>SILAR cycles                         | 0.25 M Na <sub>2</sub> S and<br>0.35 M Na <sub>2</sub> SO <sub>3</sub> | 9.7<br>(0 V <sub>Ag/AgCl</sub> , 100 mW/cm <sup>2</sup> )   | 5.75<br>(0.38 V vs.RHE)                      | This<br>work |
| Al-ZnO/CdS/Al <sub>2</sub> O <sub>3</sub><br>5 s DCMS | 0.25 M Na <sub>2</sub> S and<br>0.35 M Na <sub>2</sub> SO <sub>3</sub> | 11.4<br>(0 V <sub>Ag/AgCl</sub> , 100 mW/cm <sup>2</sup> )  | 6.6<br>(0.41 V vs.RHE)                       | This<br>work |

## References

- (1) Y. M. Tang, P. Traveerungroj, H. L. Tan, P. Wang, R. Amal, Y. H. Ng, *J. Mater. Chem. A* 2015, **3**, 19582-19587.
- (2) X. Yang, H. Li, W. Zhang, M. X. Sun, L. Q. Li, N. Xu, J. D. Wu, J. Sun, *ACS Appl. Mater. Interfaces* 2017, **9**, 658-667.
- (3) Z. M. Bai, X. Q. Yan, Y. Li, Z. Kang, S. Y. Cao, Y. Zhang, *Adv. Energy. Mater.* 2016, **6**, 1501459.
- (4) S. Y. Cao, X. Q. Yan, Z. Kang, Q. J. Liang, X. Q. Liao, Y. Zhang, *Nano Energy* 2016, **24**, 25-31.
- (5) C. M. Li, T. Ahmed, M. G. Ma, T. Edvinsson, J. F. Zhu, *Applied Catalysis B: Environmental* 2013, **138**, 175-183.
- (6) P. Y. Kuang, Y. Z. Su, K. Xiao, Z. Q. Liu, N. Li, H. J. Wang, J. Zhang, *ACS Appl. Mater. Interfaces* 2015, **7**, 16387-16394.
- (7) Y. Myung, D. M. Jang, T. K. Sung, Y. J. Sohn, G. B. Jung, Y. J. Cho, H. S. Kim, J. Park, *ACS Nano*

2010, **4**, 3789-3800.

- (8) C. Li, X. T. Zhu, H. F. Zhang, Z. C. Zhu, B. Liu, C. W. Cheng, *Adv. Mater. Interfaces* 2015, **2**, 1500428.
- (9) Q. Nie, L. Yang, C. Cao, Y. M. Zeng, G. Z. Wang, C. Z. Wang, S. W. Lin, *Chemical Engineering Journal* 2017, **325**, 151-159.
- (10) Y. C. Liu, Z. Kang, H. N. Si, P. F. Li, S. Y. Cao, S. Liu, Y. Li, S. C. Zhang, Z. Zhang, Q. L. Liao, L. Wang, Y. Zhang, *Nano Energy* 2017, **35**, 189-198.
